# Supplementary figures and images for: Effect of Organic Manures on Growth, Yield, Leaf Nutrient Uptake and Soil Properties of Kiwifruit (Actinidia deliciosa Chev.) cv. Allison
Source: MDPI journal article supplement (doi:10.3390/plants11233354), 2022-12-02

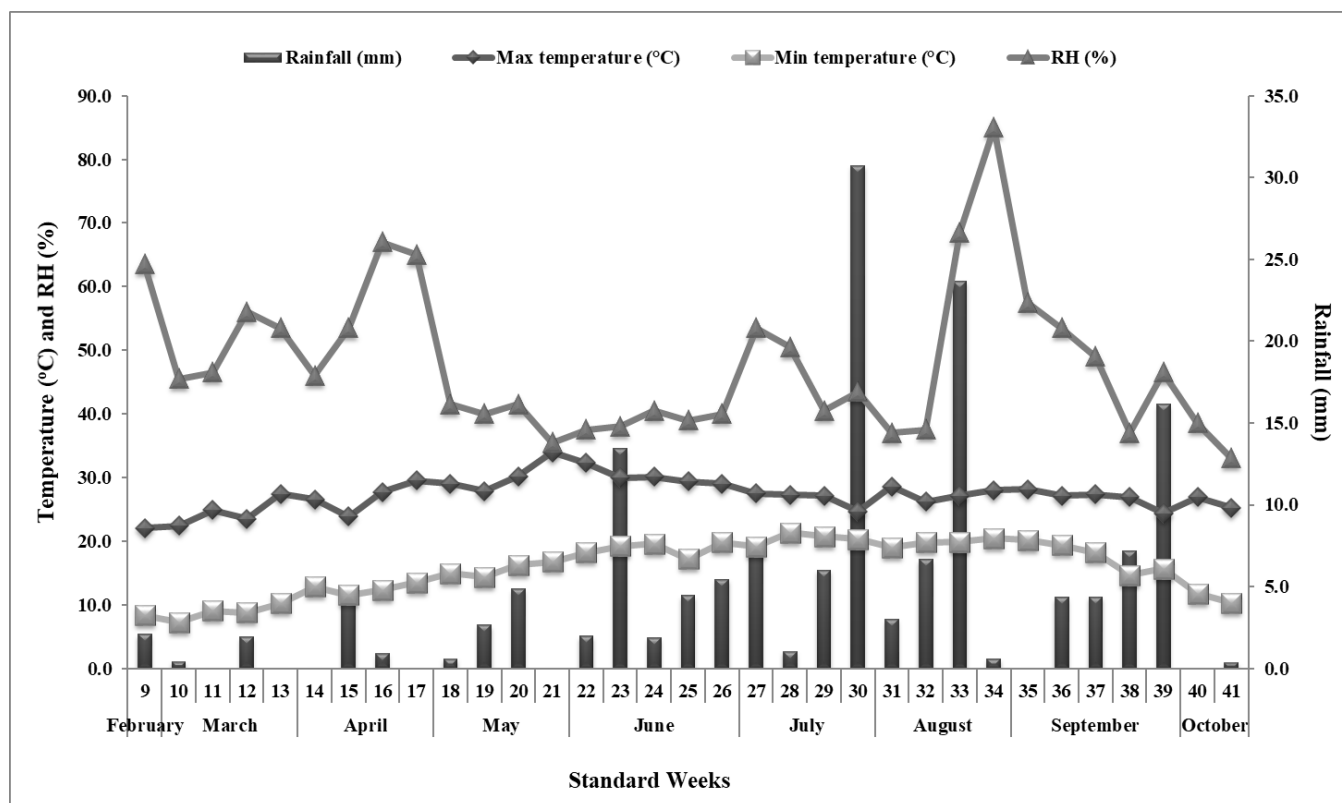

Figure S1. Meteorological observation of the experimental orchard.

Supplement: s1 [file s1]
